# Supplementary material for: Impact of homologous recombination deficiency biomarkers on outcomes in patients with early breast cancer: a systematic review protocol
Source: PubMed Central journal article supplement — BMJ Open. 2022 Aug 18;12(8):e059538. doi: 10.1136/bmjopen-2021-059538 (PMC9394194; doi:10.1136/bmjopen-2021-059538), 2022-08-18
Supplement: bmjopen-2021-059538.draft_revisions.pdf [file bmjopen-2021-059538.draft_revisions.pdf]

# BMJ Open

BMJ Open is committed to open peer review. As part of this commitment we make the peer review history of every article we publish publicly available.

When an article is published we post the peer reviewers' comments and the authors' responses online. We also post the versions of the paper that were used during peer review. These are the versions that the peer review comments apply to.

The versions of the paper that follow are the versions that were submitted during the peer review process. They are not the versions of record or the final published versions. They should not be cited or distributed as the published version of this manuscript.

BMJ Open is an open access journal and the full, final, typeset and author-corrected version of record of the manuscript is available on our site with no access controls, subscription charges or pay-per-view fees (<http://bmjopen.bmj.com>).

If you have any questions on BMJ Open's open peer review process please email [info.bmjopen@bmj.com](mailto:info.bmjopen@bmj.com)

# BMJ Open

## Impact of homologous recombination deficiency biomarkers on outcomes in patients with primary breast cancer: a systematic review protocol

|                               |                                                                                                                                                                                                                                            |
|-------------------------------|--------------------------------------------------------------------------------------------------------------------------------------------------------------------------------------------------------------------------------------------|
| Journal:                      | <i>BMJ Open</i>                                                                                                                                                                                                                            |
| Manuscript ID                 | bmjopen-2021-059538                                                                                                                                                                                                                        |
| Article Type:                 | Protocol                                                                                                                                                                                                                                   |
| Date Submitted by the Author: | 23-Nov-2021                                                                                                                                                                                                                                |
| Complete List of Authors:     | Liao, Hao; Peking University Cancer Hospital, Pei, Wendi; Peking University Third Hospital, Department of Obstetrics and Gynecology<br>Zhong, Jianxin; Peking University Cancer Hospital<br>Li, Huiping; Peking University Cancer Hospital |
| Keywords:                     | Breast tumours < ONCOLOGY, Adult oncology < ONCOLOGY, Cancer genetics < GENETICS                                                                                                                                                           |
|                               |                                                                                                                                                                                                                                            |

SCHOLARONE™  
Manuscripts

1  
2  
3  
4 1 **Impact of homologous recombination deficiency biomarkers**  
5  
6 2 **on outcomes in patients with primary breast cancer: a**  
7  
8 3 **systematic review protocol**

9  
10  
11 4  
12 5 **Hao Liao,<sup>1†</sup> Wendi Pei,<sup>2†</sup> Jianxin Zhong,<sup>1</sup> Huiping Li<sup>1\*</sup>**  
13  
14 6

15 7 1 Key Laboratory of Carcinogenesis and Translational Research (Ministry of  
16 8 Education/Beijing), Department of Breast Oncology, Peking University Cancer  
17 9 Hospital and Institute, Beijing, China,  
18

19 10 2 Center for Reproductive Medicine, Department of Obstetrics and Gynecology,  
20 11 Beijing Key Laboratory of Reproductive Endocrinology and Assisted Reproductive  
21 12 Technology and Key Laboratory of Assisted Reproduction, Ministry of Education,  
22 13 Peking University Third Hospital, Beijing, China.  
23  
24  
25  
26  
27  
28  
29

30 14  
31 15 †These authors contributed equally to this work  
32  
33

34 16  
35 17 **\*Correspondence:**

36 18 Huiping Li

37 19 [huipingli2012@hotmail.com](mailto:huipingli2012@hotmail.com)  
38  
39  
40  
41  
42  
43  
44  
45  
46  
47  
48  
49  
50  
51  
52  
53  
54  
55  
56  
57  
58  
59  
60

20 21 **Words count:** 1693

21 22 **Number of figure:** 1  
23  
24  
25

## 26 **ABSTRACT**

27 **Introduction** Breast cancer patients with homologous recombination deficiency (HRD)  
28 such as germline BRCA1/2 mutations would respond to DNA-damaging drugs. Several  
29 clinical studies have revealed that HRD biomarkers were associated with the outcomes  
30 of patients with primary breast cancer (PBC). However, no systematic review has  
31 determined the prognostic role of HRD biomarkers in PBC patients. Therefore, this  
32 study will systematically combine and analyze the results of previous studies, to  
33 facilitate the clinical use of HRD detection in PBC.

34 **Methods and analysis** We will search five databases including PubMed, Cochrane  
35 Library, EMBASE, OVID, and Web of Science through December 2021, with language  
36 restriction of English. Two reviewers will independently screen all records based on  
37 pre-established inclusion and exclusion criteria. The main outcomes include  
38 pathological Complete Response, Disease-free Survival, and Overall Survival. In  
39 addition, all studies included must contain the detection of HRD biomarkers. Data  
40 extraction will be carried out by two reviewers independently according to a self-  
41 designed template. The Newcastle-Ottawa Quality Assessment Scale and Jadad scale  
42 will be used for quality assessment for cohort studies and randomized clinical trials,  
43 respectively. Review Manager version 5.3.5 will be utilized to perform meta-analysis.  
44 Both the  $Q$  test and  $I^2$  statistic will be used to assess heterogeneity. Subgroup and  
45 sensitivity analysis will be conducted if significant heterogeneity appears and cannot  
46 be reduced by using a random-effect model.

47 **Ethics and dissemination** Ethical approval is not required for a systematic review. The  
48 results will be disseminated through international and national conferences or peer-  
49 reviewed publications.

50 **PROSPERO registration number** CRD42021286522.

51

52

53

54

## 55 **Strengths and limitations of this study**

56 This systematic review will follow the Preferred Reporting Items for Systematic  
57 Reviews and Meta-Analyses guidelines.

58 Stringent inclusion and exclusion criteria will be used to select clinical studies assessing  
59 the impact of homologous recombination deficiency biomarkers on outcomes of  
60 patients with primary breast cancer.

61 Internationally recognized scales will be used for the quality assessment, to exclude  
62 low-quality studies and enhance the credibility of pooled results.

63 Only studies published in English will be included in this systematic review.

64 Differences in patient cohort, sample size, treatment regimen, and measure of  
65 homologous recombination deficiency biomarkers may yield significant heterogeneity.

## 66 **INTRODUCTION**

67 Cancer refers to a disease in which cells divide uncontrollably and invade normal  
68 tissues[1]. Cells must undergo two genetic changes to become cancerous: activation of  
69 proto-oncogenes and inactivation of tumor suppressor genes[2]. Endogenous  
70 (replication stress, oxygen radicals, and cell metabolism) and exogenous (radiation,  
71 viral infection, and chemotherapy) damaging factors continually act on the genome of  
72 cells and caused different degrees of DNA lesions[3]. And what protects organisms  
73 from cancer is that cells have inherent repair mechanisms to eliminate these damaging  
74 events. DNA damages that occur on a single strand are to be dealt with by a number of  
75 simple repair pathways including base-excision repair (BER), nucleotide-excision  
76 repair (NER), direct repair (DR), and mismatch repair (MMR). On the contrary, DNA  
77 double-strand break (DSB), which is the most severe DNA lesion and the main driver  
78 of cancer, requires sophisticated repair pathways such as NHEJ (non-homologous end  
79 joining) and HR (homologous recombination)[4]. The HR system utilizes a  
80 homologous sister chromatid (available in the S and G2 phases of cell cycle ) as a  
81 template to copy and replace damaged DNA in a relatively error-free manner compared  
82 with NHEJ[5]. A number of key genes including BRCA1/2, RAD51, and PALB2 will  
83 encode functional proteins and get involved in the process of repair[6]. If these genes

1  
2  
3  
4 84 are mutated, the HR system will fail to perform the repair function, which is so-called  
5  
6 85 HR deficiency (HRD), leading to the accumulation of somatic mutations, chromosomal  
7  
8 86 aberrations, and genomic scars (heritable genomic changes resulted from DNA repair  
9  
10 87 defeat), as well as the development of cancer, especially breast cancer (BC)[7, 8].

11 88 BC is a highly heterogeneous disease and treated mainly based on the receptor  
12  
13 89 expression status. In recent years, with the development of sequencing technology and  
14  
15 90 our further understanding of genetic variation of cancer, numerous genes are being used  
16  
17 91 to screen for available therapeutic targets[9]. For example, DNA-damaging drugs such  
18  
19 92 as PARP inhibitors and platinums have been shown to significantly improve  
20  
21 93 Progression-free Survival in patients with advanced triple-negative BC (TNBC) with  
22  
23 94 germline BRCA1/2 mutations[10, 11]. Therefore, as key genes in the process of HR,  
24  
25 95 BRCA1/2 are generally detected to determine the HRD status of BC patients. However,  
26  
27 96 only 4% and 22% HRD can be attributed to germline BRCA1/2 mutations in BC and  
28  
29 97 TNBC, respectively[12-14]. On this condition, biomarkers with wider coverage are  
30  
31 98 needed to identify more BC patients with HRD. The HRD score is an algorithmic  
32  
33 99 assessment of three measures of loss of heterozygosity (LOH), large-scale transition  
34  
35 100 (LST), and telomeric allelic imbalance (TAI)[15]. This kind of assessment along with  
36  
37 101 BRCA mutation detection is now widely used to define the HRD status.

38  
39 102 Several studies have investigated the prognostic role of HRD score in primary BC  
40  
41 103 (PBC)[16-19]. Telli et al assessed the HRD score in three neoadjuvant TNBC trials and  
42  
43 104 found that a HRD score  $\geq 42$  or the presence of BRCA1/2 mutations were correlated  
44  
45 105 with the objective response rate to platinum-based therapy[16]. SWOG S9313 is a  
46  
47 106 phase III randomized study, comparing the efficacy of simultaneous anthracycline (A)  
48  
49 107 and cyclophosphamide (C) and sequential A→C in more than 3000 stage I/II BC  
50  
51 108 patients. Sharma et al investigated the prognostic role of HRD status in a subset of  
52  
53 109 patients from SWOG S9313. The results indicated that HRD positive status was  
54  
55 110 associated with better Disease-free Survival (DFS) (hazard ratio 0.72; 95% confidence  
56  
57 111 interval 0.51–1.00;  $P=0.049$ )[17]. Significant associations between HRD positive  
58  
59 112 status and higher pathological Complete Response (pCR) rates of PBC patients were  
60  
113 also revealed in two studies by Loibl et al and Telli et al, respectively[18, 19]. Despite

1  
2  
3  
4 114 all the above efforts, the detection of HRD biomarkers has not been incorporated into  
5  
6 115 the clinical practice of BC. In addition, no systematic review has explored the  
7  
8 116 relationship between HRD biomarkers and the prognosis of PBC patients. Therefore,  
9  
10 117 we will firstly systematically combine and analyze the results of previous studies in this  
11  
12 118 study, to facilitate the clinical use of HRD detection in PBC.

## 13 14 119 **METHODS AND ANALYSIS**

15  
16 120 This systematic review will be conducted and reported according to the Preferred  
17  
18 121 Reporting Items for Systematic Reviews and Meta-Analyses (PRISMA) 2020  
19  
20 122 statement[20]. This review's protocol has been registered in the International  
21  
22 123 Prospective Register of Systematic Reviews.

### 23 24 124 **Search strategy**

25  
26 125 Five databases including PubMed, Cochrane Library, EMBASE, OVID, and Web of  
27  
28 126 Science will be searched through December 2021, with language restriction of English.  
29  
30 127 Medical Subject Headings and free text will be combined to search for concepts such  
31  
32 128 as 'Breast Neoplasms' and 'Primary' and 'Recombinational DNA Repair'. The detailed  
33  
34 129 example of the search strategy applied in PubMed is available in online **Supplemental**  
35  
36 130 **File 1**. In addition, we will search the reference lists of recognized studies to identify  
37  
38 131 additional papers.

### 39 40 132 **Study selection**

41  
42 133 All records identified through database searching will be imported into EndNote  
43  
44 134 version 9.1 software. Firstly, duplicates will be removed using the built-in recognition  
45  
46 135 function of the software by the lead author. Then, all records will be screened by two  
47  
48 136 reviewers independently according to the title and abstracts. After that, the potentially  
49  
50 137 relevant full-text articles will be reviewed by the same two reviewers independently  
51  
52 138 based on pre-established inclusion and exclusion criteria. Finally, the remaining full-  
53  
54 139 text articles will be assessed for eligibility by the team. Disagreements between the two  
55  
56 140 reviewers will be settled by discussion. The particular reason for exclusion of each  
57  
58 141 reviewed article will be recorded and presented in the final manuscript. In addition, the  
59  
60

1  
2  
3  
4 142 reference lists of recognized studies will be searched to make sure that no potentially  
5 143 eligible article is missed.

## 8 144 **Inclusion criteria**

### 10 145 **Types of studies**

12 146 Clinical studies investigating the impact of HRD biomarkers (HRD score, BRCA1/2  
13 147 mutational status, and HRD status) on outcomes in patients with PBC will be included.

15 148 This review will only include articles published in English, with no restriction of date.

17 149 The treatment regimens in all studies included should be reasonable. For studies  
18 150 involving grouping, the treatment regimen received by patients in each group should be  
19 151 comparable.

### 23 152 **Types of participants**

24 153 Patients with histologically confirmed PBC.

### 27 154 **Interventions/exposures**

28 155 High HRD score, positive BRCA1/2 mutational status, and positive HRD status.

30 156 Specifically, the assessment of HRD score should include three measures of tumor  
31 157 genomic instability (LOH, LST, and TAI), with a cutoff of 42[16].

### 33 158 **Comparators/control**

34 159 Low HRD score, negative BRCA1/2 mutational status, and negative HRD status.

### 37 160 **Main outcomes**

38 161 Each study should contain at least one of the following outcomes:

- 40 162 1. pCR: after neoadjuvant therapy, the lesions disappeared completely, or all symptoms  
41 163 and signs of unmeasurable lesions disappeared completely;
- 42 164 2. DFS: the time from randomization to disease recurrence or death due to disease  
43 165 progression;
- 44 166 3. Overall Survival (OS): the time from randomization to death from any cause.

### 47 167 **Exclusion criteria**

48 168 Articles that meet the following criteria will be excluded:

- 49 169 1. Non-clinical studies including reviews, conference abstracts, case reports and series,  
50 170 and comments;



- 171 2. Patients with metastatic or advanced BC;
- 172 3. No detection of HRD, wrong evaluation methods of HRD score, or other cutoff
- 173 values;
- 174 4. Non-human experiments.

## 175 **Data extraction**

176 Two reviewers will independently extract data from the included studies into a self-  
177 designed data extraction template. If some important data are not available in the  
178 articles, we will make contact with the first or corresponding authors for potential  
179 support. Differences in opinion between the two reviewers will be settled by discussion.  
180 The study selection process is shown in **Figure 1**. The following study characteristics  
181 will be collected:

## 182 **Study details**

183 First author, year of publication, country/region, study design, and setting (neoadjuvant  
184 and adjuvant);

## 185 **Patients characteristics**

186 Patient subtype (hormone receptor-positive, human epidermal growth factor receptor  
187 2-positive, and TNBC), number of patients, and treatment regimen;

## 188 **Evaluation indicators**

189 Main outcomes (pCR, DFS, and OS), HRD biomarkers (HRD score, BRCA1/2  
190 mutational status, and HRD status), and score of quality assessment.

## 191 **Quality assessment**

192 Two reviewers will independently conduct quality assessment using the Newcastle-  
193 Ottawa Quality Assessment Scale (NOS) for cohort studies and Jadad scale for  
194 randomized clinical trials, respectively[21, 22]. The NOS consists of three key items:  
195 1. Selection; 2. Comparability; and 3. Outcome. One point will be added when there is  
196 enough support information for an item. One study that obtains at least 6 points will be  
197 considered as high quality, with a full score of 9 points[21]. The Jadad scale includes  
198 four key items: 1. Randomization; 2. Double blinding; 3. Concealment of allocation;  
199 and 4. Withdrawals and dropouts. If the description of one item is described and

1  
2  
3  
4 200 appropriate, two points will be added to this item. On the contrary, if the description is  
5  
6 201 not described or inappropriate, the score for this item will be zero. If the rating falls  
7  
8 202 between the two situations, one point will be added. Specially, for the item of  
9  
10 203 withdrawals and dropouts, only 1 and 0 point can be chosen. The full score of Jadad  
11  
12 204 scale is 7 points, and a score of more than 3 points means high quality[22].

## 13 14 205 **Statistical analysis**

### 15 16 206 **Data synthesis**

17  
18 207 All data will be synthesized narratively and quantitatively. If there are sufficient studies,  
19  
20 208 meta-analysis will be further conducted. Otherwise, we will only carry out systematic  
21  
22 209 review with descriptive analysis. Review Manager version 5.3.5 (Cochrane  
23  
24 210 Collaboration, Oxford, UK) will be used to pool the results. Odds ratios and hazard  
25  
26 211 ratios along with 95% confidence intervals will be calculated using the Mantel–  
27  
28 212 Haenszel method and inverse variance method, respectively. Forest plots will be used  
29  
30 213 to present the pooled results. For all statistical tests, a two-tailed *P*-value of <0.05 will  
31  
32 214 be considered statistically significant.

### 33 34 215 **Heterogeneity assessment**

35  
36 216 Before pooling the results, both the *Q* test and *I*<sup>2</sup> statistic will be used to assess  
37  
38 217 heterogeneity. A *P*-value of <0.1 and an *I*<sup>2</sup> value of >50% indicate significant  
39  
40 218 heterogeneity across studies. A fixed-effect model will be used unless considerable  
41  
42 219 heterogeneity arises. Alternatively, a random-effect model will be used.

### 43 44 220 **Subgroup and sensitivity analysis**

45  
46 221 If significant heterogeneity appears and cannot be reduced by using a random-effect  
47  
48 222 model, subgroup analysis or sensitivity analysis will be conducted to find possible  
49  
50 223 source of heterogeneity. The grouping methods of subgroup analysis will be based on  
51  
52 224 the study characteristics, patient subtypes, chemotherapy regimens, or HRD detection  
53  
54 225 methods, while the sensitivity analysis will be conducted by omitting the data of  
55  
56 226 individual studies. The potential source of heterogeneity can be identified if the  
57  
58 227 heterogeneity decreases significantly when carrying out subgroup analysis based on one  
59  
60 228 factor or discarding data from one study.

### 229 **Publication bias**

1  
2  
3  
4 230 Stata version 12.0 (Stata Corporation, College Station, TX, USA) will be used to  
5  
6 231 evaluate potential publication bias using Egger's and Begg's test. A *P*-value of <0.05  
7  
8 232 will be considered a significant publication bias.

### 233 **Patient and public involvement**

11  
12 234 Patients and/or the public are not involved in the design, conduct, reporting or  
13  
14 235 dissemination plans of this research.

## 236 **ETHICS AND DISSEMINATION**

17  
18 237 Ethical approval is not required in this study because no data are related to an individual  
19  
20 238 patient. The results will be disseminated through international and national conferences  
21  
22 239 or peer-reviewed publications.

23  
24 240 **Author contributions** HaL, WP, and JZ were responsible for the conception of the  
25  
26 241 study plan, and preparation of the manuscript. HuL reviewed the study plan and  
27  
28 242 manuscript and offered comments and edits.

29  
30 243 **Funding** None.

31  
32 244 **Competing interests** None declared.

33  
34 245 **Patient consent for publication** Not required.

35  
36 246 **Data sharing** No additional data available.

37  
38 247 **Open access** This is an open access article distributed in accordance with the Creative  
39  
40 248 Commons Attribution Non Commercial (CC BY-NC 4.0) license, which permits others  
41  
42 249 to distribute, remix, adapt, build upon this work non-commercially, and license their  
43  
44 250 derivative works on different terms, provided the original work is properly cited,  
45  
46 251 appropriate credit is given, any changes made indicated, and the use is non-commercial.  
47  
48 252 See: <http://creativecommons.org/licenses/by-nc/4.0/>.

### 253 **ORCID iDs**

51  
52 254 Hao Liao <https://orcid.org/0000-0003-4392-8514>

53  
54 255 Wendi Pei <https://orcid.org/0000-0002-7173-6678>

55  
56 256 Jianxin Zhong <https://orcid.org/0000-0002-9525-6222>

57  
58 257 Huiping Li <https://orcid.org/0000-0002-3331-647X>

## 258 **REFERENCES**

- 1  
2  
3  
4 259 1. Hanahan D, Weinberg RA. Hallmarks of cancer: the next generation. *Cell*  
5  
6 260 2011;144(5):646-74.
- 7  
8 261 2. Lee EY, Muller WJ. Oncogenes and tumor suppressor genes. *Cold Spring Harb*  
9  
10 262 *Perspect Biol* 2010;2(10):a003236.
- 11  
12 263 3. Di Micco R, Krizhanovsky V, Baker D, et al. Cellular senescence in ageing: from  
13  
14 264 mechanisms to therapeutic opportunities. *Nat Rev Mol Cell Biol* 2021;22(2):75-95.
- 15  
16 265 4. Jackson SP, Bartek J. The DNA-damage response in human biology and disease.  
17  
18 266 *Nature* 2009;461(7267):1071-8.
- 19  
20 267 5. Ward JF. Radiation mutagenesis: the initial DNA lesions responsible. *Radiat Res*  
21  
22 268 1995;142(3):362-8.
- 23  
24 269 6. Easton DF, Pharoah PD, Antoniou AC, et al. Gene-panel sequencing and the  
25  
26 270 prediction of breast-cancer risk. *N Engl J Med* 2015;372(23):2243-57.
- 27  
28 271 7. Lawrence MS, Stojanov P, Mermel CH, et al. Discovery and saturation analysis of  
29  
30 272 cancer genes across 21 tumour types. *Nature* 2014;505(7484):495-501.
- 31  
32 273 8. Ali RMM, McIntosh SA, Savage KI. Homologous recombination deficiency in  
33  
34 274 breast cancer: Implications for risk, cancer development, and therapy. *Genes*  
35  
36 275 *Chromosomes Cancer* 2021;60(5):358-72.
- 37  
38 276 9. Liao H, Li H. Advances in the Detection Technologies and Clinical Applications  
39  
40 277 of Circulating Tumor DNA in Metastatic Breast Cancer. *Cancer Manag Res*  
41  
42 278 2020;12:3547-60.
- 43  
44 279 10. Robson ME, Tung N, Conte P, et al. OlympiAD final overall survival and  
45  
46 280 tolerability results: Olaparib versus chemotherapy treatment of physician's choice in  
47  
48 281 patients with a germline BRCA mutation and HER2-negative metastatic breast cancer.  
49  
50 282 *Ann Oncol* 2019;30(4):558-66.
- 51  
52 283 11. Tutt A, Tovey H, Cheang MCU, et al. Carboplatin in BRCA1/2-mutated and triple-  
53  
54 284 negative breast cancer BRCAness subgroups: the TNT Trial. *Nat Med* 2018;24(5):628-  
55  
56 285 37.
- 57  
58 286 12. Pellegrino B, Cavanna L, Boggiani D, et al. Phase II study of eribulin in  
59  
60 287 combination with gemcitabine for the treatment of patients with locally advanced or  
288 288 metastatic triple negative breast cancer (ERIGE trial). Clinical and pharmacogenetic

- 1  
2  
3  
4 289 results on behalf of the Gruppo Oncologico Italiano di Ricerca Clinica (GOIRC). *ESMO*  
5 290 *Open* 2021;6(1):100019.
- 6  
7 291 13. Baretta Z, Mocellin S, Goldin E, et al. Effect of BRCA germline mutations on  
8 292 breast cancer prognosis: A systematic review and meta-analysis. *Medicine (Baltimore)*  
9 293 2016;95(40):e4975.
- 10  
11 294 14. Akashi-Tanaka S, Watanabe C, Takamaru T, et al. BRCAness predicts resistance  
12 295 to taxane-containing regimens in triple negative breast cancer during neoadjuvant  
13 296 chemotherapy. *Clin Breast Cancer* 2015;15(1):80-5.
- 14  
15 297 15. Marquard AM, Eklund AC, Joshi T, et al. Pan-cancer analysis of genomic scar  
16 298 signatures associated with homologous recombination deficiency suggests novel  
17 299 indications for existing cancer drugs. *Biomark Res* 2015;3:9.
- 18  
19 300 16. Telli ML, Timms KM, Reid J, et al. Homologous Recombination Deficiency (HRD)  
20 301 Score Predicts Response to Platinum-Containing Neoadjuvant Chemotherapy in  
21 302 Patients with Triple-Negative Breast Cancer. *Clin Cancer Res* 2016;22(15):3764-73.
- 22  
23 303 17. Sharma P, Barlow WE, Godwin AK, et al. Impact of homologous recombination  
24 304 deficiency biomarkers on outcomes in patients with triple-negative breast cancer treated  
25 305 with adjuvant doxorubicin and cyclophosphamide (SWOG S9313). *Ann Oncol*  
26 306 2018;29(3):654-60.
- 27  
28 307 18. Loibl S, Weber KE, Timms KM, et al. Survival analysis of carboplatin added to an  
29 308 anthracycline/taxane-based neoadjuvant chemotherapy and HRD score as predictor of  
30 309 response-final results from GeparSixto. *Ann Oncol* 2018;29(12):2341-7.
- 31  
32 310 19. Telli ML, Hellyer J, Audeh W, et al. Homologous recombination deficiency (HRD)  
33 311 status predicts response to standard neoadjuvant chemotherapy in patients with triple-  
34 312 negative or BRCA1/2 mutation-associated breast cancer. *Breast Cancer Res Treat*  
35 313 2018;168(3):625-30.
- 36  
37 314 20. Page MJ, McKenzie JE, Bossuyt PM, et al. The PRISMA 2020 statement: an  
38 315 updated guideline for reporting systematic reviews. *BMJ* 2021;372:n71.
- 39  
40 316 21. Stang A. Critical evaluation of the Newcastle-Ottawa scale for the assessment of  
41 317 the quality of nonrandomized studies in meta-analyses. *Eur J Epidemiol*  
42 318 2010;25(9):603-5.

1  
2  
3  
4 319 22. Jadad AR, Moore RA, Carroll D, et al. Assessing the quality of reports of  
5  
6 320 randomized clinical trials: is blinding necessary? *Control Clin Trials* 1996;17(1):1-12.

7  
8 321

9 322  
10  
11  
12  
13  
14  
15  
16  
17  
18  
19  
20  
21  
22  
23  
24  
25  
26  
27  
28  
29  
30  
31  
32  
33  
34  
35  
36  
37  
38  
39  
40  
41  
42  
43  
44  
45  
46  
47  
48  
49  
50  
51  
52  
53  
54  
55  
56  
57  
58  
59  
60

For peer review only

1  
2  
3  
4  
5  
6  
7  
8  
9  
10  
11  
12  
13  
14  
15  
16  
17  
18  
19  
20  
21  
22  
23  
24  
25  
26  
27  
28  
29  
30  
31  
32  
33  
34  
35  
36  
37  
38  
39  
40  
41  
42  
43  
44  
45  
46  
47  
48  
49  
50  
51  
52  
53  
54  
55  
56  
57  
58  
59  
60

323 **Figure legend**

324 **Figure 1** Flow diagram of study selection process.

For peer review only

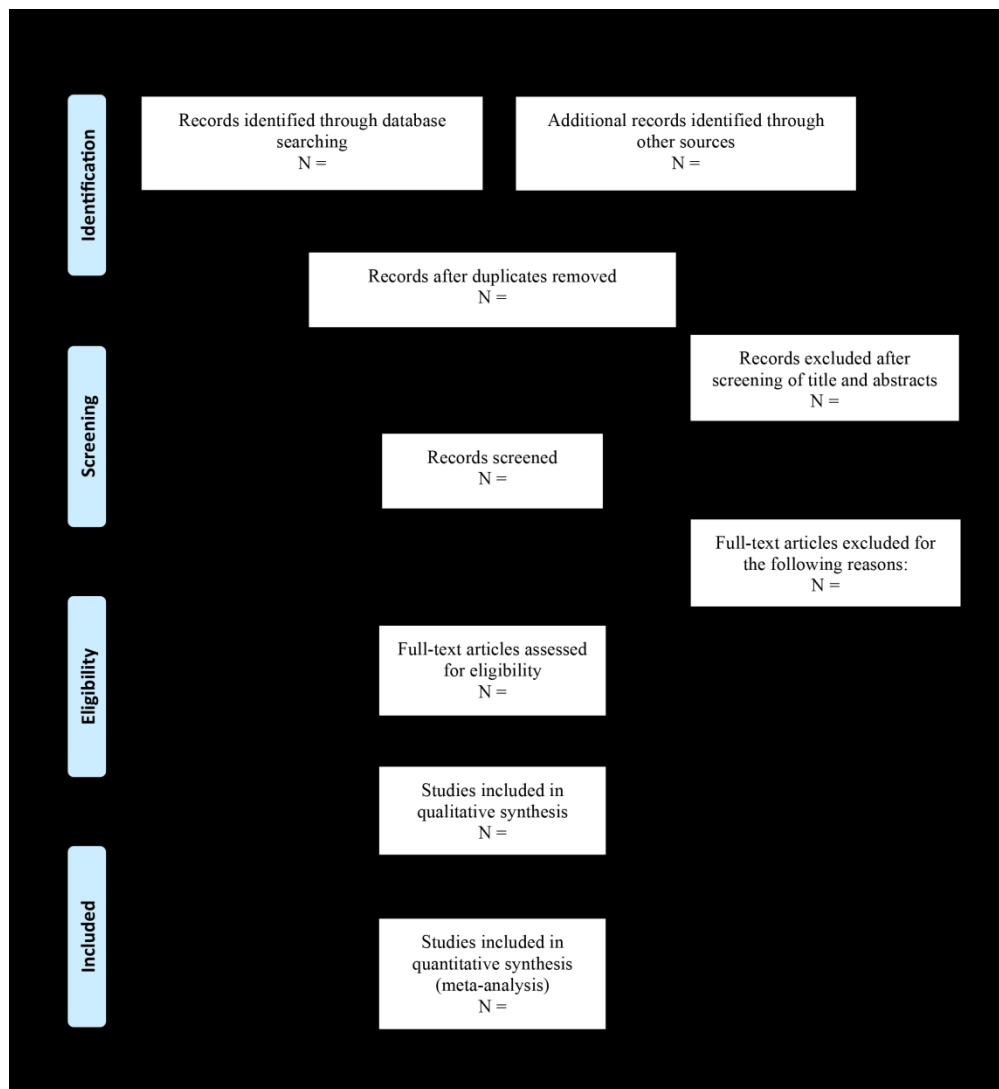

Figure 1 Flow diagram of study selection process.





**Sources:****Total N =**

PubMed N =

Cochrane Library N =

EMBASE N =

OVID N =

Web of Science N =

Other sources N =

**N records after duplications removed****N records after screening of titles and abstracts****N records after further evaluation** (N records were excluded for the following reasons: Non-clinical studies; Patients with metastatic or advanced BC; No detection of HRD, wrong evaluation methods of HRD score, or other cutoff values; and Non-human studies)**N records included in qualitative synthesis****N records included in quantitative synthesis (meta-analysis)**

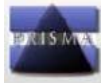

## PRISMA 2020 Checklist

| Section and Topic             | Item # | Checklist item                                                                                                                                                                                                                                                                                       | Location where item is reported |
|-------------------------------|--------|------------------------------------------------------------------------------------------------------------------------------------------------------------------------------------------------------------------------------------------------------------------------------------------------------|---------------------------------|
| <b>TITLE</b>                  |        |                                                                                                                                                                                                                                                                                                      |                                 |
| Title                         | 1      | Identify the report as a systematic review.                                                                                                                                                                                                                                                          | Line 1                          |
| <b>ABSTRACT</b>               |        |                                                                                                                                                                                                                                                                                                      |                                 |
| Abstract                      | 2      | See the PRISMA 2020 for Abstracts checklist.                                                                                                                                                                                                                                                         | Line 7                          |
| <b>INTRODUCTION</b>           |        |                                                                                                                                                                                                                                                                                                      |                                 |
| Rationale                     | 3      | Describe the rationale for the review in the context of existing knowledge.                                                                                                                                                                                                                          | Line 102                        |
| Objectives                    | 4      | Provide an explicit statement of the objective(s) or question(s) the review addresses.                                                                                                                                                                                                               | Line 114                        |
| <b>METHODS</b>                |        |                                                                                                                                                                                                                                                                                                      |                                 |
| Eligibility criteria          | 5      | Specify the inclusion and exclusion criteria for the review and how studies were grouped for the syntheses.                                                                                                                                                                                          | Line 144                        |
| Information sources           | 6      | Specify all databases, registers, websites, organisations, reference lists and other sources searched or consulted to identify studies. Specify the date when each source was last searched or consulted.                                                                                            | Line 124                        |
| Search strategy               | 7      | Present the full search strategies for all databases, registers and websites, including any filters and limits used.                                                                                                                                                                                 | Line 124                        |
| Selection process             | 8      | Specify the methods used to decide whether a study met the inclusion criteria of the review, including how many reviewers screened each record and each report retrieved, whether they worked independently, and if applicable, details of automation tools used in the process.                     | Line 132                        |
| Data collection process       | 9      | Specify the methods used to collect data from reports, including how many reviewers collected data from each report, whether they worked independently, any processes for obtaining or confirming data from study investigators, and if applicable, details of automation tools used in the process. | Line 175                        |
| Data items                    | 10a    | List and define all outcomes for which data were sought. Specify whether all results that were compatible with each outcome domain in each study were sought (e.g. for all measures, time points, analyses), and if not, the methods used to decide which results to collect.                        | Line 182                        |
|                               | 10b    | List and define all other variables for which data were sought (e.g. participant and intervention characteristics, funding sources). Describe any assumptions made about any missing or unclear information.                                                                                         | Line 182                        |
| Study risk of bias assessment | 11     | Specify the methods used to assess risk of bias in the included studies, including details of the tool(s) used, how many reviewers assessed each study and whether they worked independently, and if applicable, details of automation tools used in the process.                                    | Line 191                        |
| Effect measures               | 12     | Specify for each outcome the effect measure(s) (e.g. risk ratio, mean difference) used in the synthesis or presentation of results.                                                                                                                                                                  | Line 206                        |
| Synthesis methods             | 13a    | Describe the processes used to decide which studies were eligible for each synthesis (e.g. tabulating the study intervention characteristics and comparing against the planned groups for each synthesis (item #5)).                                                                                 | Line 206                        |
|                               | 13b    | Describe any methods required to prepare the data for presentation or synthesis, such as handling of missing summary statistics, or data conversions.                                                                                                                                                | Line 206                        |
|                               | 13c    | Describe any methods used to tabulate or visually display results of individual studies and syntheses.                                                                                                                                                                                               | Line 206                        |
|                               | 13d    | Describe any methods used to synthesize results and provide a rationale for the choice(s). If meta-analysis was performed, describe the model(s), method(s) to identify the presence and extent of statistical heterogeneity, and software package(s) used.                                          | Line 206                        |
|                               | 13e    | Describe any methods used to explore possible causes of heterogeneity among study results (e.g. subgroup analysis, meta-regression).                                                                                                                                                                 | Line 215                        |
|                               | 13f    | Describe any sensitivity analyses conducted to assess robustness of the synthesized results.                                                                                                                                                                                                         | Line 220                        |
| Reporting bias assessment     | 14     | Describe any methods used to assess risk of bias due to missing results in a synthesis (arising from reporting biases).                                                                                                                                                                              | NA                              |
| Certainty                     | 15     | Describe any methods used to assess certainty (or confidence) in the body of evidence for an outcome.                                                                                                                                                                                                | NA                              |

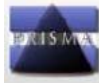

## PRISMA 2020 Checklist

| Section and Topic                              | Item # | Checklist item                                                                                                                                                                                                                                                                       | Location where item is reported |
|------------------------------------------------|--------|--------------------------------------------------------------------------------------------------------------------------------------------------------------------------------------------------------------------------------------------------------------------------------------|---------------------------------|
| assessment                                     |        |                                                                                                                                                                                                                                                                                      |                                 |
| <b>RESULTS</b>                                 |        |                                                                                                                                                                                                                                                                                      |                                 |
| Study selection                                | 16a    | Describe the results of the search and selection process, from the number of records identified in the search to the number of studies included in the review, ideally using a flow diagram.                                                                                         | NA                              |
|                                                | 16b    | Cite studies that might appear to meet the inclusion criteria, but which were excluded, and explain why they were excluded.                                                                                                                                                          | NA                              |
| Study characteristics                          | 17     | Cite each included study and present its characteristics.                                                                                                                                                                                                                            | NA                              |
| Risk of bias in studies                        | 18     | Present assessments of risk of bias for each included study.                                                                                                                                                                                                                         | NA                              |
| Results of individual studies                  | 19     | For all outcomes, present, for each study: (a) summary statistics for each group (where appropriate) and (b) an effect estimate and its precision (e.g. confidence/credible interval), ideally using structured tables or plots.                                                     | NA                              |
| Results of syntheses                           | 20a    | For each synthesis, briefly summarise the characteristics and risk of bias among contributing studies.                                                                                                                                                                               | NA                              |
|                                                | 20b    | Present results of all statistical syntheses conducted. If meta-analysis was done, present for each the summary estimate and its precision (e.g. confidence/credible interval) and measures of statistical heterogeneity. If comparing groups, describe the direction of the effect. | NA                              |
|                                                | 20c    | Present results of all investigations of possible causes of heterogeneity among study results.                                                                                                                                                                                       | NA                              |
|                                                | 20d    | Present results of all sensitivity analyses conducted to assess the robustness of the synthesized results.                                                                                                                                                                           | NA                              |
| Reporting biases                               | 21     | Present assessments of risk of bias due to missing results (arising from reporting biases) for each synthesis assessed.                                                                                                                                                              | NA                              |
| Certainty of evidence                          | 22     | Present assessments of certainty (or confidence) in the body of evidence for each outcome assessed.                                                                                                                                                                                  | NA                              |
| <b>DISCUSSION</b>                              |        |                                                                                                                                                                                                                                                                                      |                                 |
| Discussion                                     | 23a    | Provide a general interpretation of the results in the context of other evidence.                                                                                                                                                                                                    | NA                              |
|                                                | 23b    | Discuss any limitations of the evidence included in the review.                                                                                                                                                                                                                      | NA                              |
|                                                | 23c    | Discuss any limitations of the review processes used.                                                                                                                                                                                                                                | NA                              |
|                                                | 23d    | Discuss implications of the results for practice, policy, and future research.                                                                                                                                                                                                       | NA                              |
| <b>OTHER INFORMATION</b>                       |        |                                                                                                                                                                                                                                                                                      |                                 |
| Registration and protocol                      | 24a    | Provide registration information for the review, including register name and registration number, or state that the review was not registered.                                                                                                                                       | Line 50                         |
|                                                | 24b    | Indicate where the review protocol can be accessed, or state that a protocol was not prepared.                                                                                                                                                                                       | NA                              |
|                                                | 24c    | Describe and explain any amendments to information provided at registration or in the protocol.                                                                                                                                                                                      | NA                              |
| Support                                        | 25     | Describe sources of financial or non-financial support for the review, and the role of the funders or sponsors in the review.                                                                                                                                                        | Line 243                        |
| Competing interests                            | 26     | Declare any competing interests of review authors.                                                                                                                                                                                                                                   | Line 244                        |
| Availability of data, code and other materials | 27     | Report which of the following are publicly available and where they can be found: template data collection forms; data extracted from included studies; data used for all analyses; analytic code; any other materials used in the review.                                           | NA                              |

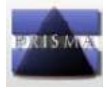

## PRISMA 2020 Checklist

- 1
- 2
- 3
- 4
- 5
- 6
- 7
- 8
- 9
- 10
- 11
- 12
- 13
- 14
- 15
- 16
- 17
- 18
- 19
- 20
- 21
- 22
- 23
- 24
- 25
- 26
- 27
- 28
- 29
- 30
- 31
- 32
- 33
- 34
- 35
- 36
- 37
- 38
- 39
- 40
- 41
- 42
- 43
- 44
- 45
- 46
- 47

10.1136/bmj.n71

For more information, visit: <http://www.prisma-statement.org/>

For peer review only

# BMJ Open

## Impact of homologous recombination deficiency biomarkers on outcomes in patients with early breast cancer: a systematic review protocol

|                                 |                                                                                                                                                                                                                                                                                                                                                                                                                                                                                                                                                                                                                                                                                                                                                                                                                                  |
|---------------------------------|----------------------------------------------------------------------------------------------------------------------------------------------------------------------------------------------------------------------------------------------------------------------------------------------------------------------------------------------------------------------------------------------------------------------------------------------------------------------------------------------------------------------------------------------------------------------------------------------------------------------------------------------------------------------------------------------------------------------------------------------------------------------------------------------------------------------------------|
| Journal:                        | <i>BMJ Open</i>                                                                                                                                                                                                                                                                                                                                                                                                                                                                                                                                                                                                                                                                                                                                                                                                                  |
| Manuscript ID                   | bmjopen-2021-059538.R1                                                                                                                                                                                                                                                                                                                                                                                                                                                                                                                                                                                                                                                                                                                                                                                                           |
| Article Type:                   | Protocol                                                                                                                                                                                                                                                                                                                                                                                                                                                                                                                                                                                                                                                                                                                                                                                                                         |
| Date Submitted by the Author:   | 06-Mar-2022                                                                                                                                                                                                                                                                                                                                                                                                                                                                                                                                                                                                                                                                                                                                                                                                                      |
| Complete List of Authors:       | Liao, Hao; Peking University Cancer Hospital, Key Laboratory of Carcinogenesis and Translational Research (Ministry of Education/Beijing), Department of Breast Oncology<br>Pei, Wendi; Peking University Third Hospital, Center for Reproductive Medicine, Department of Obstetrics and Gynecology, Beijing Key Laboratory of Reproductive Endocrinology and Assisted Reproductive Technology and Key Laboratory of Assisted Reproduction, Ministry of Education<br>Zhong, Jianxin; Peking University Cancer Hospital, Key Laboratory of Carcinogenesis and Translational Research (Ministry of Education/Beijing), Department of Breast Oncology<br>Li, Huiping; Peking University Cancer Hospital, Key Laboratory of Carcinogenesis and Translational Research (Ministry of Education/Beijing), Department of Breast Oncology |
| <b>Primary Subject Heading</b>: | Oncology                                                                                                                                                                                                                                                                                                                                                                                                                                                                                                                                                                                                                                                                                                                                                                                                                         |
| Secondary Subject Heading:      | Genetics and genomics                                                                                                                                                                                                                                                                                                                                                                                                                                                                                                                                                                                                                                                                                                                                                                                                            |
| Keywords:                       | Breast tumours < ONCOLOGY, Adult oncology < ONCOLOGY, Cancer genetics < GENETICS                                                                                                                                                                                                                                                                                                                                                                                                                                                                                                                                                                                                                                                                                                                                                 |
|                                 |                                                                                                                                                                                                                                                                                                                                                                                                                                                                                                                                                                                                                                                                                                                                                                                                                                  |

SCHOLARONE™  
Manuscripts

1  
2  
3  
4 1 **Impact of homologous recombination deficiency biomarkers**  
5  
6 2 **on outcomes in patients with early breast cancer: a systematic**  
7  
8 3 **review protocol**

9  
10  
11 4  
12 5 **Hao Liao,<sup>1†</sup> Wendi Pei,<sup>2†</sup> Jianxin Zhong,<sup>1</sup> Huiping Li<sup>1\*</sup>**  
13  
14 6

15 7 1 Key Laboratory of Carcinogenesis and Translational Research (Ministry of  
16 8 Education/Beijing), Department of Breast Oncology, Peking University Cancer  
17 9 Hospital and Institute, Beijing, China,  
18

19 2 Center for Reproductive Medicine, Department of Obstetrics and Gynecology,  
20 21 Beijing Key Laboratory of Reproductive Endocrinology and Assisted Reproductive  
22 23 Technology and Key Laboratory of Assisted Reproduction, Ministry of Education,  
24 25 Peking University Third Hospital, Beijing, China.  
26 27  
28 14

29 15 †These authors contributed equally to this work  
30 16

31 17 **\*Correspondence:**

32 18 Huiping Li

33 19 [huipingli2012@hotmail.com](mailto:huipingli2012@hotmail.com)  
34 20

35 21 **Words count:** 1842

36 22 **Number of figure:** 1  
37 23  
38 24  
39 25  
40  
41  
42  
43  
44  
45  
46  
47  
48  
49  
50  
51  
52  
53  
54  
55  
56  
57  
58  
59  
60

## 26 **ABSTRACT**

27 **Introduction** Breast cancer patients with homologous recombination deficiency (HRD)  
28 such as germline BRCA1/2 mutations would respond to DNA-damaging drugs. Several  
29 clinical studies have revealed that HRD biomarkers were associated with the outcomes  
30 of patients with early breast cancer (EBC). However, no systematic review has  
31 determined the prognostic role of HRD biomarkers in EBC patients. Therefore, this  
32 study will systematically combine and analyze the results of previous studies, to  
33 facilitate the clinical use of HRD detection in EBC.

34 **Methods and analysis** We will search five databases including PubMed, Cochrane  
35 Library, EMBASE, OVID, and Web of Science through December 2021, with no  
36 language restriction. Two reviewers will independently screen all records based on pre-  
37 established inclusion and exclusion criteria. The main outcomes include pathological  
38 Complete Response, Disease-free Survival, and Overall Survival. In addition, all  
39 studies included must contain the detection of HRD score, HRD status, or HRD-related  
40 gene mutational status and protein expression. Data extraction will be carried out by  
41 two reviewers independently according to a self-designed template. The Newcastle-  
42 Ottawa Quality Assessment Scale and Jadad scale will be used for quality assessment  
43 for cohort studies and randomized clinical trials, respectively. Review Manager version  
44 5.3.5 will be utilized to perform meta-analysis. Both the  $Q$  test and  $I^2$  statistic will be  
45 used to assess heterogeneity. Subgroup and sensitivity analysis will be conducted if  
46 significant heterogeneity appears and cannot be reduced by using a random-effect  
47 model.

48 **Ethics and dissemination** Ethical approval is not required for a systematic review. The  
49 results will be disseminated through international and national conferences or peer-  
50 reviewed publications.

51 **PROSPERO registration number** CRD42021286522.

52

53

54



## 55 **Strengths and limitations of this study**

56 This systematic review will follow the Preferred Reporting Items for Systematic  
57 Reviews and Meta-Analyses guidelines.

58 Stringent inclusion and exclusion criteria will be used to select clinical studies assessing  
59 the impact of homologous recombination deficiency (HRD) biomarkers (HRD score,  
60 HRD status, and HRD-related gene mutational status and protein expression) on  
61 outcomes of patients with early breast cancer.

62 Internationally recognized scales will be used for the quality assessment, to exclude  
63 low-quality studies and enhance the credibility of pooled results.

64 Differences in patient cohort, sample size, treatment regimen, and measure of  
65 homologous recombination deficiency biomarkers may yield significant heterogeneity.

## 66 **INTRODUCTION**

67 Cancer refers to a disease in which cells divide uncontrollably and invade normal  
68 tissues[1]. In the pathogenesis of most cancers, normal cells need to undergo certain  
69 genetic changes to become cancerous such as activation of proto-oncogenes and  
70 inactivation of tumor suppressor genes[2]. For example, the occurrence of  
71 retinoblastoma is often accompanied by the mutation of the tumor suppressor gene  
72 RB1[3]. Endogenous (replication stress, oxygen radicals, and cell metabolism) and  
73 exogenous (radiation, viral infection, and chemotherapy) damaging factors continually  
74 act on the genome of cells and caused different degrees of DNA lesions[4]. And what  
75 protects organisms from cancer is that cells have inherent repair mechanisms to  
76 eliminate these damaging events. DNA damages that occur on a single strand are to be  
77 dealt with by a number of simple repair pathways including base-excision repair (BER),  
78 nucleotide-excision repair (NER), direct repair (DR), and mismatch repair (MMR). On  
79 the contrary, DNA double-strand break (DSB), which is the most severe DNA lesion  
80 and the main driver of cancer, requires sophisticated repair pathways such as NHEJ  
81 (non-homologous end joining) and HR (homologous recombination)[5]. The HR  
82 system utilizes a homologous sister chromatid (available in the S and G2 phases of cell  
83 cycle ) as a template to copy and replace damaged DNA in a relatively error-free

1  
2  
3  
4 84 manner compared with NHEJ[6]. A number of key genes including BRCA1/2, RAD51,  
5  
6 85 and PALB2 will encode functional proteins and get involved in the process of repair[7].  
7  
8 86 If these genes are mutated, the HR system will fail to perform the repair function, which  
9  
10 87 is so-called HR deficiency (HRD), leading to the accumulation of somatic mutations,  
11  
12 88 chromosomal aberrations, and genomic scars (heritable genomic changes resulted from  
13  
14 89 DNA repair defeat), as well as the development of cancer, especially breast cancer  
15  
16 90 (BC)[8, 9].

17  
18 91 BC is a highly heterogeneous disease and treated mainly based on the receptor  
19  
20 92 expression status. In recent years, with the development of sequencing technology and  
21  
22 93 our further understanding of genetic variation of cancer, numerous genes are being used  
23  
24 94 to screen for available therapeutic targets[10]. For example, DNA-damaging drugs such  
25  
26 95 as PARP inhibitors and platinums have been shown to significantly improve  
27  
28 96 Progression-free Survival in patients with advanced triple-negative BC (TNBC) with  
29  
30 97 germline BRCA1/2 mutations[11, 12]. Moreover, based on the latest data from phase  
31  
32 98 III OlympiA trial, adjuvant olaparib was shown to significantly improve the primary  
33  
34 99 endpoint of invasive Disease-free Survival (DFS) vs. placebo in patients with germline  
35  
36 100 BRCA1/2-mutated high-risk EBC (3-year invasive DFS rate: 85.9% vs. 77.1%; hazard  
37  
38 101 ratio 0.58, 95% confidence interval 0.41-0.82,  $P<0.001$ )[13]. Therefore, as key genes  
39  
40 102 in the process of HR, BRCA1/2 are generally detected to determine the HRD status of  
41  
42 103 BC patients. However, only 4% and 22% HRD can be attributed to germline BRCA1/2  
43  
44 104 mutations in BC and TNBC, respectively[14-16]. On this condition, biomarkers with  
45  
46 105 wider coverage are needed to identify more BC patients with HRD. The HRD score is  
47  
48 106 an algorithmic assessment of three measures of loss of heterozygosity (LOH), large-  
49  
50 107 scale transition (LST), and telomeric allelic imbalance (TAI)[17]. This kind of  
51  
52 108 assessment along with BRCA mutation detection is now widely used to define the HRD  
53  
54 109 status.

55  
56 110 Several studies have investigated the prognostic role of HRD score in early BC  
57  
58 111 (EBC)[18-21]. Telli et al assessed the HRD score in three neoadjuvant TNBC trials and  
59  
60 112 found that a HRD score  $\geq 42$  or the presence of BRCA1/2 mutations were correlated

1  
2  
3  
4 113 with the objective response rate to platinum-based therapy[18]. SWOG S9313 is a  
5  
6 114 phase III randomized study, comparing the efficacy of simultaneous anthracycline (A)  
7  
8 115 and cyclophosphamide (C) and sequential A→C in more than 3000 stage I/II BC  
9  
10 116 patients. Sharma et al investigated the prognostic role of HRD status in a subset of  
11  
12 117 patients from SWOG S9313. The results indicated that HRD positive status was  
13  
14 118 associated with better DFS (hazard ratio 0.72, 95% confidence interval 0.51–1.00,  
15  
16 119  $P=0.049$ )[19]. Significant associations between HRD positive status and higher  
17  
18 120 pathological Complete Response (pCR) rates of EBC patients were also revealed in two  
19  
20 121 studies by Loibl et al and Telli et al, respectively[20, 21]. Despite all the above efforts,  
21  
22 122 the detection of HRD biomarkers has not been incorporated into the clinical practice of  
23  
24 123 BC. In addition, no systematic review has explored the relationship between HRD  
25  
26 124 biomarkers and the prognosis of EBC patients. Therefore, we will firstly systematically  
27  
28 125 combine and analyze the results of previous studies in this study, to facilitate the clinical  
29  
30 126 use of HRD detection in EBC.

## 31 127 **METHODS AND ANALYSIS**

32  
33 128 This systematic review is expected to begin on December 1, 2021 and end on June 30,  
34  
35 129 2022 and will be conducted and reported according to the Preferred Reporting Items  
36  
37 130 for Systematic Reviews and Meta-Analyses (PRISMA) 2020 statement[22]. This  
38  
39 131 review's protocol has been registered in the International Prospective Register of  
40  
41 132 Systematic Reviews.

### 42 43 133 **Search strategy**

44  
45 134 Five databases including PubMed, Cochrane Library, EMBASE, OVID, and Web of  
46  
47 135 Science will be searched from December 1, 2021 to March 31, 2022, with no language  
48  
49 136 restriction. Medical Subject Headings and free text will be combined to search for  
50  
51 137 concepts such as 'Breast Neoplasms' and 'Early' and 'Recombinational DNA Repair'  
52  
53 138 and 'Biomarkers'. The detailed example of the search strategy applied in PubMed is  
54  
55 139 available in online **Supplemental File 1**. In addition, we will search the reference lists  
56  
57 140 of recognized studies to identify additional papers.  
58  
59  
60

## 141 **Study selection**

142 All records identified through database searching will be imported into EndNote  
143 version 9.1 software. Firstly, duplicates will be removed using the built-in recognition  
144 function of the software by the lead author. Then, all records will be screened by two  
145 reviewers independently according to the title and abstracts. After that, the potentially  
146 relevant full-text articles will be reviewed by the same two reviewers independently  
147 based on pre-established inclusion and exclusion criteria. Finally, the remaining full-  
148 text articles will be assessed for eligibility by the team. Disagreements between the two  
149 reviewers will be settled by discussion. The particular reason for exclusion of each  
150 reviewed article will be recorded and presented in the final manuscript. In addition, the  
151 reference lists of recognized studies will be searched to make sure that no potentially  
152 eligible article is missed.

## 153 **Inclusion criteria**

### 154 **Types of studies**

155 Clinical studies investigating the impact of HRD biomarkers (HRD score, HRD status,  
156 and HRD-related gene mutational status and protein expression) on outcomes in  
157 patients with EBC will be included. Concretely, the HRD-related genes/proteins mainly  
158 include ATM, ATR, BARD1, BLM, BRCA1, BRCA2, BRIP1, CHEK2, MRE11A,  
159 NBN, PALB2, RAD51C, RAD51D, RBBP8, SLX4, and XRCC2[23]. This review will  
160 include articles published in any language, with no restriction of date. Non-English  
161 articles potentially eligible for inclusion will be translated to obtain enough data. The  
162 rationality of treatment regimens in all included studies will be confirmed by the lead  
163 author based on the recommendations of NCCN clinical practice guidelines[24]. For  
164 studies involving grouping, the treatment regimen received by patients in each group  
165 should be comparable.

### 166 **Types of participants**

167 Patients with histologically confirmed EBC.

### 168 **Interventions/exposures**

169 High HRD score, positive HRD status, positive gene mutational status, and positive

1  
2  
3  
4 170 protein expression. Specifically, the assessment of HRD score should include three  
5 171 measures of tumor genomic instability (LOH, LST, and TAI), with a cutoff of 42[18].

### 172 **Comparators/control**

173 Low HRD score, negative HRD status, negative gene mutational status, and loss of  
174 protein expression.

### 175 **Main outcomes**

176 Each study should contain at least one of the following outcomes:

- 177 1. pCR: no invasive carcinoma in primary site and negative regional lymph node  
178 (ypT0/ypTis ypN0) after neoadjuvant therapy[25];
- 179 2. DFS: the time from randomization to disease recurrence or death due to disease  
180 progression;
- 181 3. Overall Survival (OS): the time from randomization to death from any cause.

### 182 **Exclusion criteria**

183 Articles that meet the following criteria will be excluded:

- 184 1. Non-clinical studies including reviews, conference abstracts, case reports and series,  
185 and comments;
- 186 2. Patients with metastatic or advanced BC;
- 187 3. No detection of HRD, wrong evaluation methods of HRD score, or other cutoff  
188 values;
- 189 4. Non-human experiments.

### 190 **Data extraction**

191 Two reviewers will independently extract data from the included studies into a self-  
192 designed data extraction template. If some important data are not available in the  
193 articles, we will make contact with the first or corresponding authors for potential  
194 support. Differences in opinion between the two reviewers will be settled by discussion.  
195 The study selection process is shown in **Figure 1**. The following study characteristics  
196 will be collected:

### 197 **Study details**

198 First author, year of publication, country/region, study design, and setting (neoadjuvant

1  
2  
3  
4 199 and adjuvant);

5  
6 200 **Patients characteristics**

7 201 Patient subtype (hormone receptor-positive, human epidermal growth factor receptor  
8  
9 202 2-positive, and TNBC), number of patients, and treatment regimen;

10  
11 203 **Evaluation indicators**

12  
13 204 Main outcomes (pCR, DFS, and OS), HRD biomarkers (HRD score, HRD status, and  
14  
15 205 HRD-related gene mutational status and protein expression), and score of quality  
16  
17 206 assessment.

18  
19 207 **Quality assessment**

20  
21 208 Two reviewers will independently conduct quality assessment using the Newcastle-  
22  
23 209 Ottawa Quality Assessment Scale (NOS) for cohort studies and Jadad scale for  
24  
25 210 randomized clinical trials, respectively[26, 27]. The NOS consists of three key items:

26  
27 211 1. Selection; 2. Comparability; and 3. Outcome. One point will be added when there is  
28  
29 212 enough support information for an item. One study that obtains at least 6 points will be  
30  
31 213 considered as high quality, with a full score of 9 points[26]. The Jadad scale includes  
32  
33 214 four key items: 1. Randomization; 2. Double blinding; 3. Concealment of allocation;  
34  
35 215 and 4. Withdrawals and dropouts. If the description of one item is described and  
36  
37 216 appropriate, two points will be added to this item. On the contrary, if the description is  
38  
39 217 not described or inappropriate, the score for this item will be zero. If the rating falls  
40  
41 218 between the two situations, one point will be added. Specially, for the item of  
42  
43 219 withdrawals and dropouts, only 1 and 0 point can be chosen. The full score of Jadad  
44  
45 220 scale is 7 points, and a score of more than 3 points means high quality[27].

46  
47 221 **Statistical analysis**

48  
49 222 **Data synthesis**

50  
51 223 All data will be synthesized narratively and quantitatively. If there are more than two  
52  
53 224 studies for one outcome, meta-analysis will be further conducted[28]. Otherwise, we  
54  
55 225 will only carry out systematic review with descriptive analysis. Review Manager  
56  
57 226 version 5.3.5 (Cochrane Collaboration, Oxford, UK) will be used to pool the results.  
58  
59 227 Odds ratios and hazard ratios along with 95% confidence intervals will be calculated

228 using the Mantel–Haenszel method and inverse variance method, respectively. Forest  
229 plots will be used to present the pooled results. For all statistical tests, a two-tailed *P*-  
230 value of <0.05 will be considered statistically significant.

### 231 **Heterogeneity assessment**

232 Before pooling the results, both the *Q* test and *I*<sup>2</sup> statistic will be used to assess  
233 heterogeneity. A *P*-value of <0.1 and an *I*<sup>2</sup> value of >50% indicate significant  
234 heterogeneity across studies. A fixed-effect model will be used unless considerable  
235 heterogeneity arises. Alternatively, a random-effect model will be used.

### 236 **Subgroup and sensitivity analysis**

237 If significant heterogeneity appears and cannot be reduced by using a random-effect  
238 model, subgroup analysis or sensitivity analysis will be conducted to find possible  
239 source of heterogeneity. The grouping methods of subgroup analysis will be based on  
240 the study characteristics, patient subtypes, chemotherapy regimens, or HRD detection  
241 methods, while the sensitivity analysis will be conducted by omitting the data of  
242 individual studies. The potential source of heterogeneity can be identified if the  
243 heterogeneity decreases significantly when carrying out subgroup analysis based on one  
244 factor or discarding data from one study.

### 245 **Publication bias**

246 Stata version 12.0 (Stata Corporation, College Station, TX, USA) will be used to  
247 evaluate potential publication bias using Egger's and Begg's test. A *P*-value of <0.05  
248 will be considered a significant publication bias.

### 249 **Patient and public involvement**

250 Patients and/or the public are not involved in the design, conduct, reporting or  
251 dissemination plans of this research.

## 252 **ETHICS AND DISSEMINATION**

253 Ethical approval is not required in this study because no data are related to an individual  
254 patient. The results will be disseminated through international and national conferences  
255 or peer-reviewed publications.

256 **Author contributions** HaL, WP, and JZ were responsible for the conception of the

1  
2  
3  
4 257 study plan, and preparation of the manuscript. HuL reviewed the study plan and  
5  
6 258 manuscript and offered comments and edits.

7  
8 259 **Funding** None.

9  
10 260 **Competing interests** None declared.

11  
12 261 **Patient consent for publication** Not required.

13  
14 262 **Data sharing** No additional data available.

15  
16 263 **Open access** This is an open access article distributed in accordance with the Creative  
17  
18 264 Commons Attribution Non Commercial (CC BY-NC 4.0) license, which permits others  
19  
20 265 to distribute, remix, adapt, build upon this work non-commercially, and license their  
21  
22 266 derivative works on different terms, provided the original work is properly cited,  
23  
24 267 appropriate credit is given, any changes made indicated, and the use is non-commercial.  
25  
26 268 See: <http://creativecommons.org/licenses/by-nc/4.0/>.

27  
28 269 **ORCID iDs**

29  
30 270 Hao Liao <https://orcid.org/0000-0003-4392-8514>

31  
32 271 Wendi Pei <https://orcid.org/0000-0002-7173-6678>

33  
34 272 Jianxin Zhong <https://orcid.org/0000-0002-9525-6222>

35  
36 273 Huiping Li <https://orcid.org/0000-0002-3331-647X>

## 37 38 274 **REFERENCES**

39  
40 275 1. Hanahan D, Weinberg RA. Hallmarks of cancer: the next generation. *Cell*  
41  
42 276 2011;144(5):646-74.

43  
44 277 2. Lee EY, Muller WJ. Oncogenes and tumor suppressor genes. *Cold Spring Harb*  
45  
46 278 *Perspect Biol* 2010;2(10):a003236.

47  
48 279 3. Kamihara J, Bourdeaut F, Foulkes WD, et al. Retinoblastoma and Neuroblastoma  
49  
50 280 Predisposition and Surveillance. *Clin Cancer Res* 2017;23(13).

51  
52 281 4. Di Micco R, Krizhanovsky V, Baker D, et al. Cellular senescence in ageing: from  
53  
54 282 mechanisms to therapeutic opportunities. *Nat Rev Mol Cell Biol* 2021;22(2):75-95.

55  
56 283 5. Jackson SP, Bartek J. The DNA-damage response in human biology and disease.  
57  
58 284 *Nature* 2009;461(7267):1071-8.

59  
60 285 6. Ward JF. Radiation mutagenesis: the initial DNA lesions responsible. *Radiat Res*



- 1  
2  
3  
4 286 1995;142(3):362-8.
- 5  
6 287 7. Easton DF, Pharoah PD, Antoniou AC, et al. Gene-panel sequencing and the  
7  
8 288 prediction of breast-cancer risk. *N Engl J Med* 2015;372(23):2243-57.
- 9  
10 289 8. Lawrence MS, Stojanov P, Mermel CH, et al. Discovery and saturation analysis of  
11  
12 290 cancer genes across 21 tumour types. *Nature* 2014;505(7484):495-501.
- 13  
14 291 9. Ali RMM, McIntosh SA, Savage KI. Homologous recombination deficiency in  
15  
16 292 breast cancer: Implications for risk, cancer development, and therapy. *Genes  
17  
18 293 Chromosomes Cancer* 2021;60(5):358-72.
- 19  
20 294 10. Liao H, Li H. Advances in the Detection Technologies and Clinical Applications  
21  
22 295 of Circulating Tumor DNA in Metastatic Breast Cancer. *Cancer Manag Res*  
23  
24 296 2020;12:3547-60.
- 25  
26 297 11. Robson ME, Tung N, Conte P, et al. OlympiAD final overall survival and  
27  
28 298 tolerability results: Olaparib versus chemotherapy treatment of physician's choice in  
29  
30 299 patients with a germline BRCA mutation and HER2-negative metastatic breast cancer.  
31  
32 300 *Ann Oncol* 2019;30(4):558-66.
- 33  
34 301 12. Tutt A, Tovey H, Cheang MCU, et al. Carboplatin in BRCA1/2-mutated and triple-  
35  
36 302 negative breast cancer BRCAness subgroups: the TNT Trial. *Nat Med* 2018;24(5):628-  
37  
38 303 37.
- 39  
40 304 13. Tutt ANJ, Garber JE, Kaufman B, et al. Adjuvant Olaparib for Patients with  
41  
42 305 BRCA1- or BRCA2-Mutated Breast Cancer. *N Engl J Med* 2021;384(25):2394-405.
- 43  
44 306 14. Pellegrino B, Cavanna L, Boggiani D, et al. Phase II study of eribulin in  
45  
46 307 combination with gemcitabine for the treatment of patients with locally advanced or  
47  
48 308 metastatic triple negative breast cancer (ERIGE trial). Clinical and pharmacogenetic  
49  
50 309 results on behalf of the Gruppo Oncologico Italiano di Ricerca Clinica (GOIRC). *ESMO  
51  
52 310 Open* 2021;6(1):100019.
- 53  
54 311 15. Baretta Z, Mocellin S, Goldin E, et al. Effect of BRCA germline mutations on  
55  
56 312 breast cancer prognosis: A systematic review and meta-analysis. *Medicine (Baltimore)*  
57  
58 313 2016;95(40):e4975.
- 59  
60 314 16. Akashi-Tanaka S, Watanabe C, Takamaru T, et al. BRCAness predicts resistance

- 1  
2  
3  
4 315 to taxane-containing regimens in triple negative breast cancer during neoadjuvant  
5  
6 316 chemotherapy. *Clin Breast Cancer* 2015;15(1):80-5.
- 7  
8 317 17. Marquard AM, Eklund AC, Joshi T, et al. Pan-cancer analysis of genomic scar  
9  
10 318 signatures associated with homologous recombination deficiency suggests novel  
11  
12 319 indications for existing cancer drugs. *Biomark Res* 2015;3:9.
- 13  
14 320 18. Telli ML, Timms KM, Reid J, et al. Homologous Recombination Deficiency (HRD)  
15  
16 321 Score Predicts Response to Platinum-Containing Neoadjuvant Chemotherapy in  
17  
18 322 Patients with Triple-Negative Breast Cancer. *Clin Cancer Res* 2016;22(15):3764-73.
- 19  
20 323 19. Sharma P, Barlow WE, Godwin AK, et al. Impact of homologous recombination  
21  
22 324 deficiency biomarkers on outcomes in patients with triple-negative breast cancer treated  
23  
24 325 with adjuvant doxorubicin and cyclophosphamide (SWOG S9313). *Ann Oncol*  
25  
26 326 2018;29(3):654-60.
- 27  
28 327 20. Loibl S, Weber KE, Timms KM, et al. Survival analysis of carboplatin added to an  
29  
30 328 anthracycline/taxane-based neoadjuvant chemotherapy and HRD score as predictor of  
31  
32 329 response-final results from GeparSixto. *Ann Oncol* 2018;29(12):2341-7.
- 33  
34 330 21. Telli ML, Hellyer J, Audeh W, et al. Homologous recombination deficiency (HRD)  
35  
36 331 status predicts response to standard neoadjuvant chemotherapy in patients with triple-  
37  
38 332 negative or BRCA1/2 mutation-associated breast cancer. *Breast Cancer Res Treat*  
39  
40 333 2018;168(3):625-30.
- 41  
42 334 22. Page MJ, McKenzie JE, Bossuyt PM, et al. The PRISMA 2020 statement: an  
43  
44 335 updated guideline for reporting systematic reviews. *BMJ* 2021;372:n71.
- 45  
46 336 23. Norquist BM, Brady MF, Harrell MI, et al. Mutations in Homologous  
47  
48 337 Recombination Genes and Outcomes in Ovarian Carcinoma Patients in GOG 218: An  
49  
50 338 NRG Oncology/Gynecologic Oncology Group Study. *Clin Cancer Res*  
51  
52 339 2018;24(4):777-83.
- 53  
54 340 24. Gradishar WJ, Anderson BO, Abraham J, et al. Breast Cancer, Version 3.2020,  
55  
56 341 NCCN Clinical Practice Guidelines in Oncology. *J Natl Compr Canc Ne*  
57  
58 342 2020;18(4):452-78.
- 59  
60 343 25. Cortazar P, Zhang L, Untch M, et al. Pathological complete response and long-

- 1  
2  
3  
4 344 term clinical benefit in breast cancer: the CTNeoBC pooled analysis. *Lancet*  
5 345 2014;384(9938):164-72.  
6  
7 346 26. Stang A. Critical evaluation of the Newcastle-Ottawa scale for the assessment of  
8  
9 347 the quality of nonrandomized studies in meta-analyses. *Eur J Epidemiol*  
10 348 2010;25(9):603-5.  
11  
12  
13 349 27. Jadad AR, Moore RA, Carroll D, et al. Assessing the quality of reports of  
14  
15 350 randomized clinical trials: is blinding necessary? *Control Clin Trials* 1996;17(1):1-12.  
16  
17 351 28. Valentine JC, Pigott TD, Rothstein HR. How Many Studies Do You Need?: A  
18  
19 352 Primer on Statistical Power for Meta-Analysis. *J Educ Behav Stat* 2010;35(2):215-47.

21 353

22 354

1  
2  
3  
4 **355 Figure legend**

5  
6 **356 Figure 1** Flow diagram of study selection process.  
7  
8  
9  
10  
11  
12  
13  
14  
15  
16  
17  
18  
19  
20  
21  
22  
23  
24  
25  
26  
27  
28  
29  
30  
31  
32  
33  
34  
35  
36  
37  
38  
39  
40  
41  
42  
43  
44  
45  
46  
47  
48  
49  
50  
51  
52  
53  
54  
55  
56  
57  
58  
59  
60

For peer review only

1  
2  
3  
4  
5  
6  
7  
8  
9  
10  
11  
12  
13  
14  
15  
16  
17  
18  
19  
20  
21  
22  
23  
24  
25  
26  
27  
28  
29  
30  
31  
32  
33  
34  
35  
36  
37  
38  
39  
40  
41  
42  
43  
44  
45  
46  
47  
48  
49  
50  
51  
52  
53  
54  
55  
56  
57  
58  
59  
60

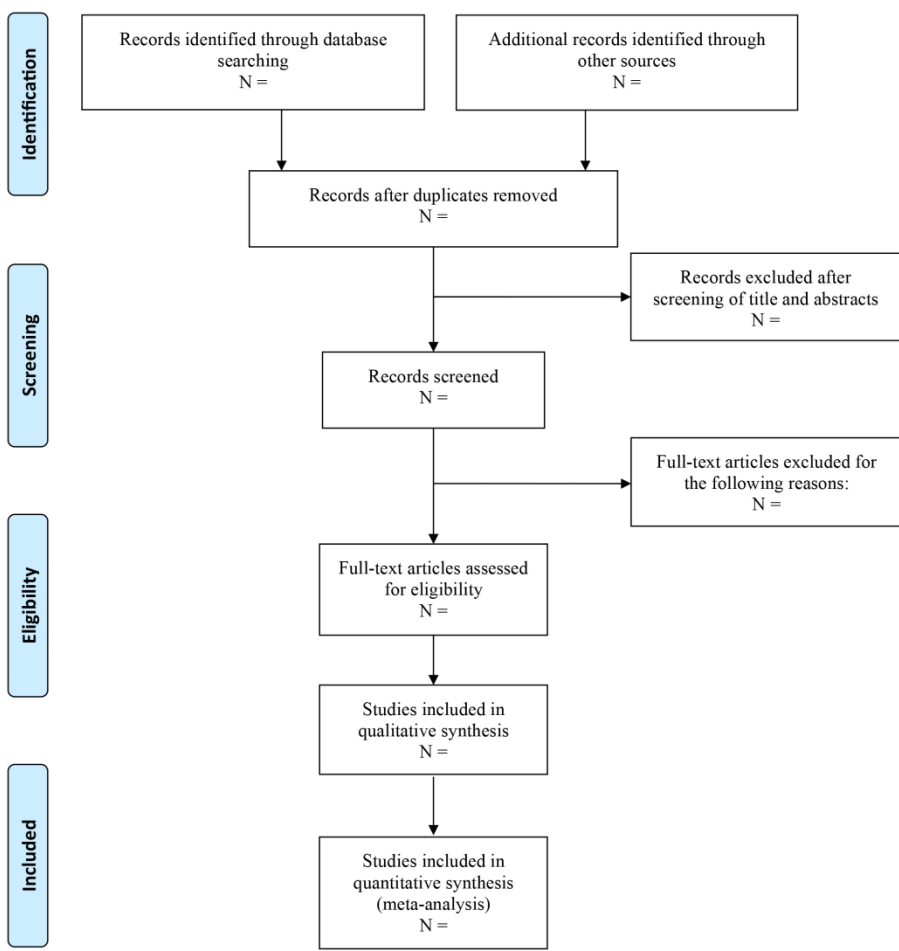

Figure 1 Flow diagram of study selection process.

**Main search algorithm:**

(((("Breast Neoplasms"[Mesh]) OR (((((((((((((((((((((((((((((((((((((((Breast Neoplasm)  
 OR (Neoplasm, Breast)) OR (Breast Tumors)) OR (Breast Tumor)) OR (Tumor, Breast))  
 OR (Tumors, Breast)) OR (Neoplasms, Breast)) OR (Breast Cancer)) OR (Cancer,  
 Breast)) OR (Mammary Cancer)) OR (Cancer, Mammary)) OR (Cancers, Mammary))  
 OR (Mammary Cancers)) OR (Malignant Neoplasm of Breast)) OR (Breast Malignant  
 Neoplasm)) OR (Breast Malignant Neoplasms)) OR (Malignant Tumor of Breast)) OR  
 (Breast Malignant Tumor)) OR (Breast Malignant Tumors)) OR (Cancer of Breast)) OR  
 (Cancer of the Breast)) OR (Mammary Carcinoma, Human)) OR (Carcinoma, Human  
 Mammary)) OR (Carcinomas, Human Mammary)) OR (Human Mammary  
 Carcinomas)) OR (Mammary Carcinomas, Human)) OR (Human Mammary  
 Carcinoma)) OR (Mammary Neoplasms, Human)) OR (Human Mammary Neoplasm))  
 OR (Human Mammary Neoplasms)) OR (Neoplasm, Human Mammary)) OR  
 (Neoplasms, Human Mammary)) OR (Mammary Neoplasm, Human)) OR (Breast  
 Carcinoma)) OR (Breast Carcinomas)) OR (Carcinoma, Breast)) OR (Carcinomas,  
 Breast))) AND ((((((Primary) OR (Early)) OR (Operable)) OR (Resectable)) OR  
 (Curable)) OR (Non-metastatic)) OR (Non-advanced))) AND (("Recombinational  
 DNA Repair"[Mesh]) OR (((((((((((((((((((((((((((((((((((((((Recombinational DNA Repair) OR (DNA  
 Repair, Recombinational)) OR (Repair, Recombinational DNA)) OR (Recombinational  
 Repair of DNA)) OR (DNA Recombinational Repair)) OR (Homologous  
 Recombinational Repair)) OR (Homologous Recombinational Repairs)) OR  
 (Recombinational Repair, Homologous)) OR (Repair, Homologous Recombinational))  
 OR (Homologous Recombination Repair)) OR (Recombination Repair, Homologous))  
 OR (Homologous Recombination Repair of DNA)) OR (Homologous Recombination  
 DNA Repair)) OR (Recombination Repair)) OR (Repair, Recombination)) OR  
 (Homologous Recombination Double-Stranded Break DNA Repair)) OR (Homologous  
 Recombination Double Stranded Break DNA Repair)) OR (Homology-Directed  
 dsDNA Break Repair)) OR (Homology Directed dsDNA Break Repair)))) AND  
 (((biomarkers) OR (biomarker)) OR (gene)) OR (protein))

**Sources:****Total N =**

PubMed N =

Cochrane Library N =

EMBASE N =

OVID N =

Web of Science N =

Other sources N =

**N records after duplications removed****N records after screening of titles and abstracts****N records after further evaluation** (N records were excluded for the following reasons: Non-clinical studies; Patients with metastatic or advanced BC; No detection of HRD, wrong evaluation methods of HRD score, or other cutoff values; and Non-human studies)**N records included in qualitative synthesis****N records included in quantitative synthesis (meta-analysis)**

**PRISMA-P (Preferred Reporting Items for Systematic review and Meta-Analysis Protocols) 2015 checklist: recommended items to address in a systematic review protocol\***

| Section and topic                 | Item No | Checklist item                                                                                                                                                                                                                | Location where item is reported |
|-----------------------------------|---------|-------------------------------------------------------------------------------------------------------------------------------------------------------------------------------------------------------------------------------|---------------------------------|
| <b>ADMINISTRATIVE INFORMATION</b> |         |                                                                                                                                                                                                                               |                                 |
| Title:                            |         |                                                                                                                                                                                                                               |                                 |
| Identification                    | 1a      | Identify the report as a protocol of a systematic review                                                                                                                                                                      | Line 1                          |
| Update                            | 1b      | If the protocol is for an update of a previous systematic review, identify as such                                                                                                                                            | Not applicable                  |
| Registration                      | 2       | If registered, provide the name of the registry (such as PROSPERO) and registration number                                                                                                                                    | Line 51                         |
| Authors:                          |         |                                                                                                                                                                                                                               |                                 |
| Contact                           | 3a      | Provide name, institutional affiliation, e-mail address of all protocol authors; provide physical mailing address of corresponding author                                                                                     | Line 5-19                       |
| Contributions                     | 3b      | Describe contributions of protocol authors and identify the guarantor of the review                                                                                                                                           | Line 256-258                    |
| Amendments                        | 4       | If the protocol represents an amendment of a previously completed or published protocol, identify as such and list changes; otherwise, state plan for documenting important protocol amendments                               | Not applicable                  |
| Support:                          |         |                                                                                                                                                                                                                               |                                 |
| Sources                           | 5a      | Indicate sources of financial or other support for the review                                                                                                                                                                 | Line 259                        |
| Sponsor                           | 5b      | Provide name for the review funder and/or sponsor                                                                                                                                                                             | Not applicable                  |
| Role of sponsor or funder         | 5c      | Describe roles of funder(s), sponsor(s), and/or institution(s), if any, in developing the protocol                                                                                                                            | Not applicable                  |
| <b>INTRODUCTION</b>               |         |                                                                                                                                                                                                                               |                                 |
| Rationale                         | 6       | Describe the rationale for the review in the context of what is already known                                                                                                                                                 | Line 67-120                     |
| Objectives                        | 7       | Provide an explicit statement of the question(s) the review will address with reference to participants, interventions, comparators, and outcomes (PICO)                                                                      | Line 121-126, line 166-181      |
| <b>METHODS</b>                    |         |                                                                                                                                                                                                                               |                                 |
| Eligibility criteria              | 8       | Specify the study characteristics (such as PICO, study design, setting, time frame) and report characteristics (such as years considered, language, publication status) to be used as criteria for eligibility for the review | Line 154-181                    |
| Information sources               | 9       | Describe all intended information sources (such as electronic databases, contact with study authors, trial registers or other grey literature sources) with planned dates of coverage                                         | Line 134-135                    |
| Search strategy                   | 10      | Present draft of search strategy to be used for at least one electronic database, including planned limits, such that it could be repeated                                                                                    | Line 136-140                    |



|                                    |     |                                                                                                                                                                                                                                                  |                |
|------------------------------------|-----|--------------------------------------------------------------------------------------------------------------------------------------------------------------------------------------------------------------------------------------------------|----------------|
| Study records:                     |     |                                                                                                                                                                                                                                                  |                |
| Data management                    | 11a | Describe the mechanism(s) that will be used to manage records and data throughout the review                                                                                                                                                     | Line 142-143   |
| Selection process                  | 11b | State the process that will be used for selecting studies (such as two independent reviewers) through each phase of the review (that is, screening, eligibility and inclusion in meta-analysis)                                                  | Line 143-152   |
| Data collection process            | 11c | Describe planned method of extracting data from reports (such as piloting forms, done independently, in duplicate), any processes for obtaining and confirming data from investigators                                                           | Line 191-195   |
| Data items                         | 12  | List and define all variables for which data will be sought (such as PICO items, funding sources), any pre-planned data assumptions and simplifications                                                                                          | Line 198-206   |
| Outcomes and prioritization        | 13  | List and define all outcomes for which data will be sought, including prioritization of main and additional outcomes, with rationale                                                                                                             | Line 176-181   |
| Risk of bias in individual studies | 14  | Describe anticipated methods for assessing risk of bias of individual studies, including whether this will be done at the outcome or study level, or both; state how this information will be used in data synthesis                             | Line 208-220   |
| Data synthesis                     | 15a | Describe criteria under which study data will be quantitatively synthesised                                                                                                                                                                      | Line 223-225   |
|                                    | 15b | If data are appropriate for quantitative synthesis, describe planned summary measures, methods of handling data and methods of combining data from studies, including any planned exploration of consistency (such as $I^2$ , Kendall's $\tau$ ) | Line 225-230   |
|                                    | 15c | Describe any proposed additional analyses (such as sensitivity or subgroup analyses, meta-regression)                                                                                                                                            | Line 237-244   |
|                                    | 15d | If quantitative synthesis is not appropriate, describe the type of summary planned                                                                                                                                                               | Line 224-225   |
| Meta-bias(es)                      | 16  | Specify any planned assessment of meta-bias(es) (such as publication bias across studies, selective reporting within studies)                                                                                                                    | Line 246-248   |
| Confidence in cumulative evidence  | 17  | Describe how the strength of the body of evidence will be assessed (such as GRADE)                                                                                                                                                               | Not applicable |

**\* It is strongly recommended that this checklist be read in conjunction with the PRISMA-P Explanation and Elaboration (cite when available) for important clarification on the items. Amendments to a review protocol should be tracked and dated. The copyright for PRISMA-P (including checklist) is held by the PRISMA-P Group and is distributed under a Creative Commons Attribution Licence 4.0.**

*From: Shamseer L, Moher D, Clarke M, Ghersi D, Liberati A, Petticrew M, Shekelle P, Stewart L, PRISMA-P Group. Preferred reporting items for systematic review and meta-analysis protocols (PRISMA-P) 2015: elaboration and explanation. BMJ. 2015 Jan 2;349(jan02 1):g7647.*
