# Supplementary material for: Impact of homologous recombination deficiency biomarkers on outcomes in patients with early breast cancer: a systematic review protocol
Source: PubMed Central journal article supplement — BMJ Open. 2022 Aug 18;12(8):e059538. doi: 10.1136/bmjopen-2021-059538 (PMC9394194; doi:10.1136/bmjopen-2021-059538), 2022-08-18
Supplement: bmjopen-2021-059538supp001.pdf [file bmjopen-2021-059538supp001.pdf]

**Sources:****Total N =**

PubMed N =

Cochrane Library N =

EMBASE N =

OVID N =

Web of Science N =

Other sources N =

**N records after duplications removed****N records after screening of titles and abstracts****N records after further evaluation** (N records were excluded for the following reasons: Non-clinical studies; Patients with metastatic or advanced BC; No detection of HRD, wrong evaluation methods of HRD score, or other cutoff values; and Non-human studies)**N records included in qualitative synthesis****N records included in quantitative synthesis (meta-analysis)**
